# Supplementary material for: Coenzyme-protein interactions since early life
Source: eLife journal article supplement (doi:10.7554/elife.94174), 2024-02-26

**Supplementary File 6:** Amino acid fractional differences observed across all coenzyme binding sites. (A) Amino acid fractional difference of all coenzymes. (B) Amino acid fractional difference of all coenzymes at the residue level.


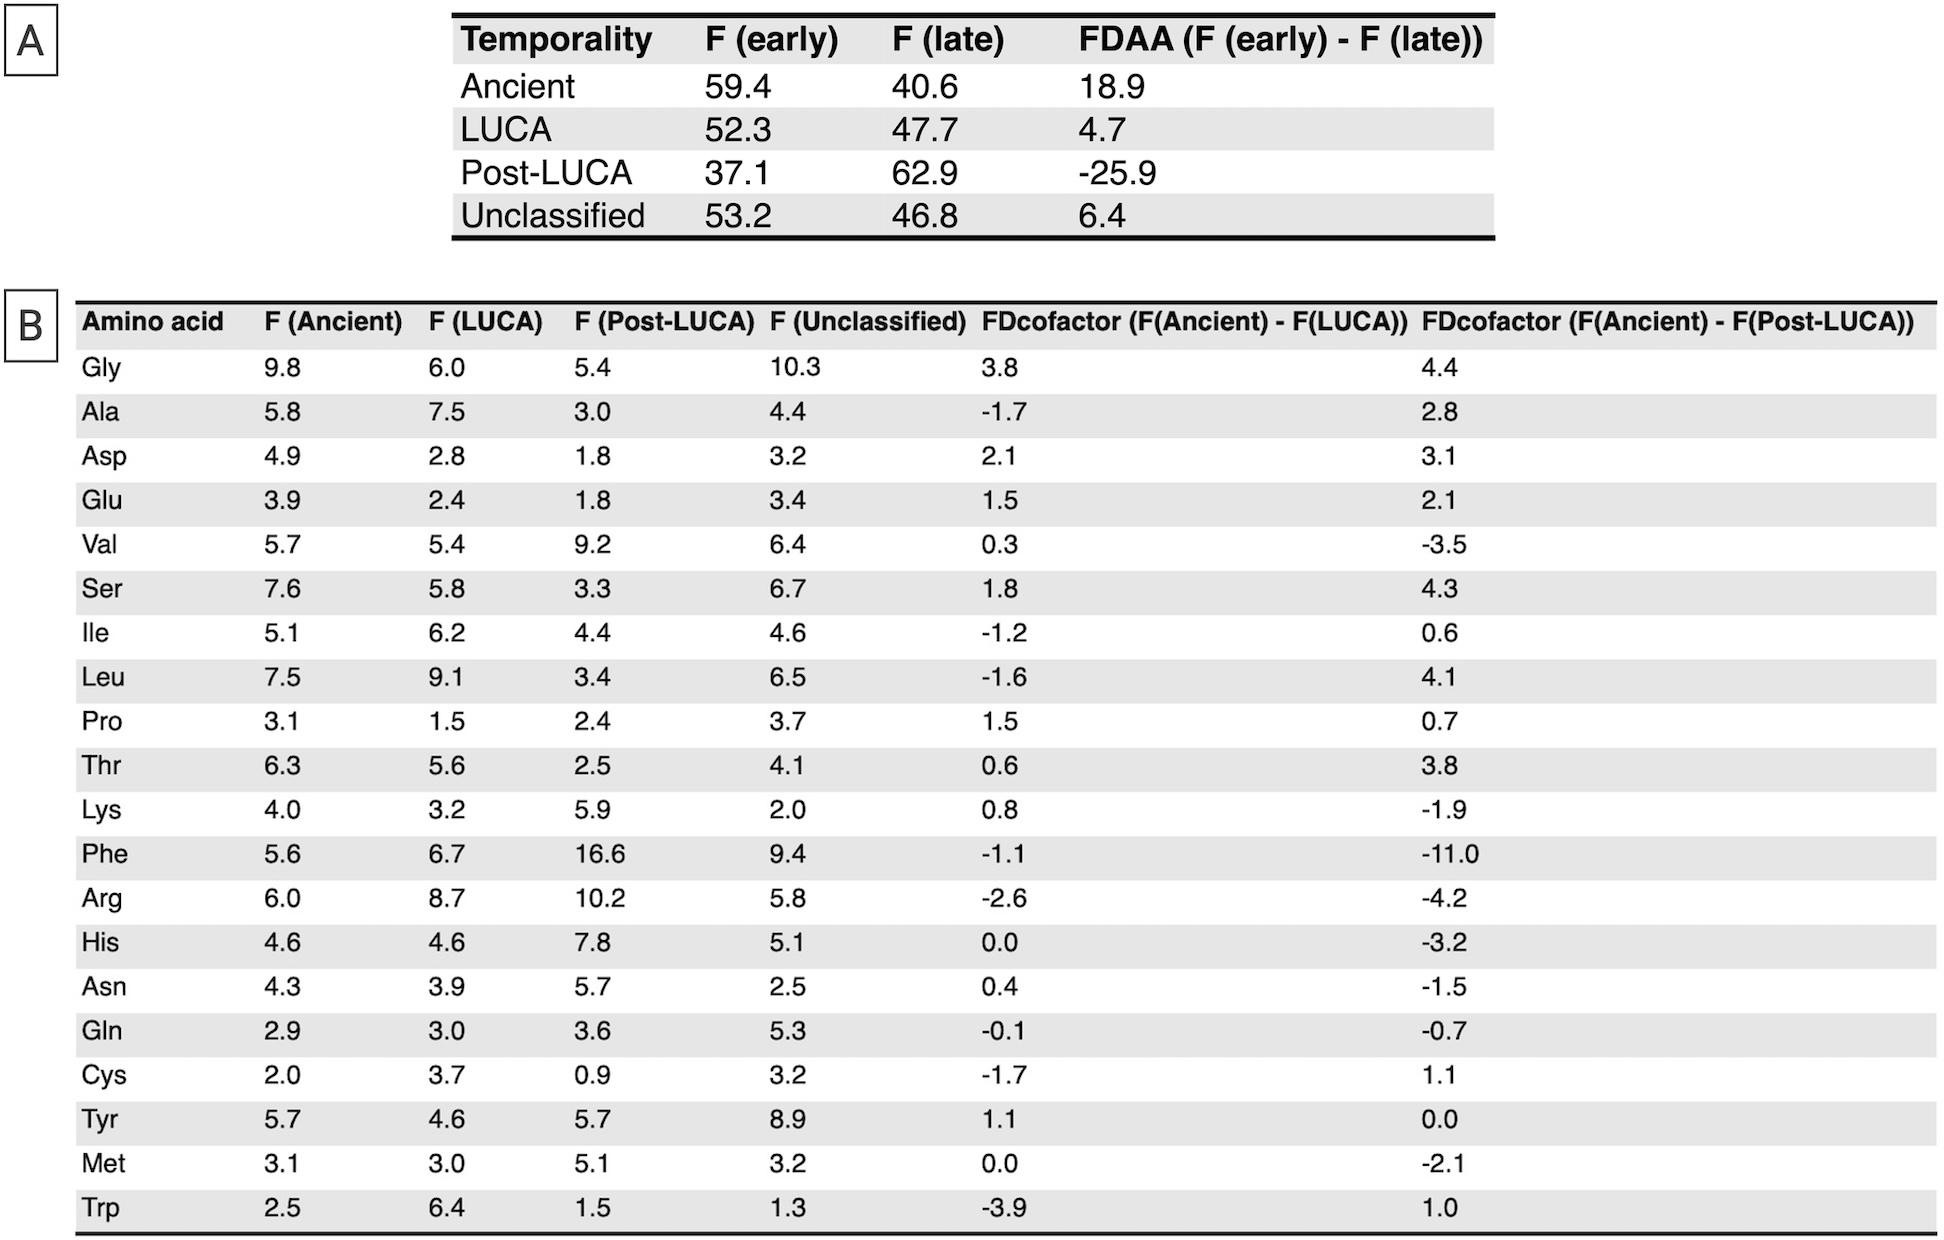

Supplement: supp6 [file supplementary file 6.docx]
