# Supplementary material for: Coenzyme-protein interactions since early life
Source: eLife journal article supplement (doi:10.7554/elife.94174), 2024-02-26

**Supplementary File 7:** Amino acid fractional differences observed across all non- phosphate containing coenzyme binding sites. (A) Amino acid fractional difference of non- phosphate containing coenzymes. (B) Amino acid fractional difference of non-phosphate containing coenzymes at residue level.


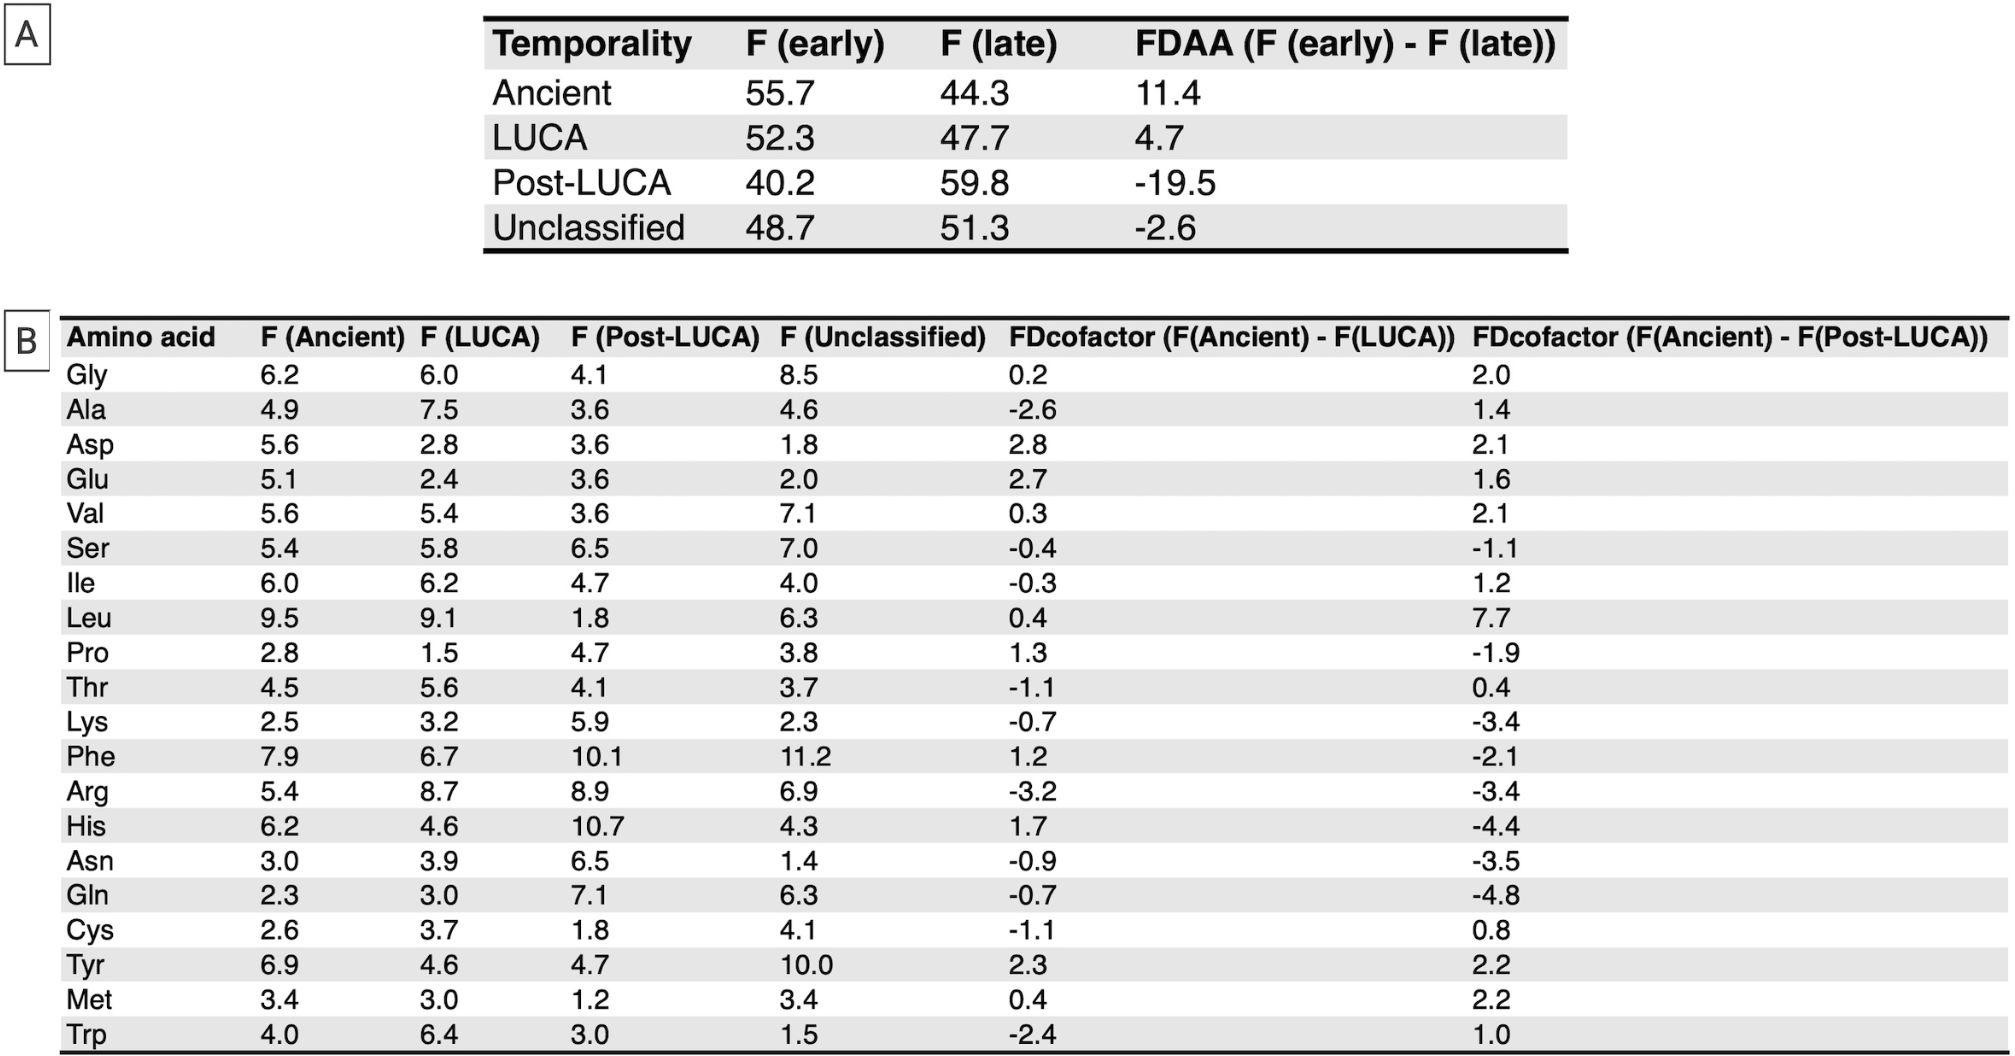

Supplement: supp7 [file supplementary file 7.docx]
