# Supplementary material for: Coenzyme-protein interactions since early life
Source: eLife. 2025 Dec 4;13:RP94174. doi: 10.7554/eLife.94174 (PMC12677900; doi:10.7554/eLife.94174)
Supplement: Supplementary file 2. [file elife-94174-supp2.xlsx]

## Sheet: Supplementary_file_2
Coenzyme class	Temporality	Coenzyme code	Chemical component code from PDB chemical component dictionary	Number of PDBe entries with cluster of 90% sequence identity	Number of UniProt codes	UniProt codes of PDBe entries with cluster of 90% sequence identity
ATP	Ancient	ATP	ATP, ADP, AMP, ANP, ACP, DTP, AGS, DAT, APC, A12, AN2, ADX, M33, 8NA, 5X8	6061	2232	A0A022MRT4, A0A024B7W1, A0A024L327, A0A037YGY1, A0A045JPX7, A0A059VAZ3, A0A072U2X9, A0A076V769, A0A076YIY5, A0A077EJ65, A0A077JG85, A0A085GHR3, A0A087X2I1, A0A097P1P8, A0A0A1E0U0, A0A0A2ACP7, A0A0A6YVN3, A0A0A6YVN6, A0A0A7HFE1, A0A0A7HGA1, A0A0B0QJR1, A0A0B0SD75, A0A0B4LHJ5, A0A0B4W229, A0A0B5GUD2, A0A0D1DQH0, A0A0D5YC82, A0A0D5YEC3, A0A0E0TG05, A0A0E3TT64, A0A0F6FJ34, A0A0F7J8S0, A0A0F7R6G7, A0A…
FAD	Ancient	FAD	6FA, FA8, FAA, FAB, FAD, FAE, FAO, FAS, FCG, FDA, FED, FNK, FSH, P5F, RFL, SFD	2188	700	A0A059WYP6, A0A060SC37, A0A063Y6V3, A0A075BSX9, A0A076MZ01, A0A077ELH4, A0A098DND1, A0A0A8XFY0, A0A0B5RNJ4, A0A0D6G5S3, A0A0D6GJV1, A0A0E3QWH3, A0A0G4DCU0, A0A0H2WWS2, A0A0H2Z9F5, A0A0H3ASL8, A0A0H3JN45, A0A0H3LWY9, A0A0H4TFU4, A0A0J5T0B0, A0A0M3KL21, A0A0M4U3V7, A0A0U0ARX4, A0A0U1ZL01, A0A100XEC2, A0A125V3V6, A0A125V455, A0A125V4E7, A0A140UHM1, A0A158RFS7, A0A1D6HB67, A0A1D6QQD6, A0A1D8PJF9, A0A…
FMN	Ancient	FMN	4LS, 4LU, 9O9, 9P3, 9PF, 9Q6, 9QF, F7F, FMN, FNR, FNS, IRF, RBF	1204	387	A0A072ZCW8, A0A077L6X8, A0A0B0IKH9, A0A0C6DRW4, A0A0H2UP38, A0A0H2URW2, A0A0H2VHN8, A0A0H2WWM9, A0A0H3M323, A0A0K0VJM8, A0A0K0VJM9, A0A0K6ITW2, A0A0L8AFM7, A0A0M3KKW1, A0A0U1RIB4, A0A125SA26, A0A125SA29, A0A140UHJ0, A0A1S3V7V2, A0A1T3V7R2, A0A1V1W347, A0A1X0ZT96, A0A3B6UEK8, A0A3E1QXW7, A0A452CSW8, A0A5F1BUV8, A0A5H1ZR30, A0QWT2, A0R1H7, A0R2V4, A0R6D0, A1B5I2, A1B9E3, A1E8I9, A1WUH0, A2QHE5, A2R…
NAD	Ancient	NAD	0WD, 1DG, 3AA, 3CD, 5J8, 6V0, 80F, 8ID, A3D, AP0, CNA, CND, DG1, DN4, DND, DQV, EAD, ENA, LNC, N01, NA0, NAD, NAE, NAI, NAJ, NAP, NAQ, NAX, NBD, NBP, NDA, NDC, NDE, NDO, NDP, NHD, NHO, NJP, NPW, ODP, P1H, PAD, SAD, SAE, SND, TAD, TAP, TDT, TXD, TXE, TXP, ZID	3564	1393	A0A003, A0A023GUL3, A0A023PKG5, A0A031LXI5, A0A045J1S8, A0A059TC02, A0A063Y6V3, A0A071L2P8, A0A075B5G8, A0A075B5H0, A0A075B5H4, A0A077EDS4, A0A077EGR8, A0A077GFB1, A0A087WNH6, A0A088E2H7, A0A090SK43, A0A096LNF0, A0A096P8D3, A0A0A1EQY0, A0A0A7I0A5, A0A0B0DTN8, A0A0B0DWX0, A0A0B1KWV6, A0A0B5RNJ4, A0A0C5DR25, A0A0D7LY80, A0A0F6AK91, A0A0F6SD02, A0A0H2UPS5, A0A0H2UR04, A0A0H2UYY2, A0A0H2V7F2, A0A0H2V…
CoA	Ancient	COA	01A, 01K, 0ET, 1C4, 1CV, 1CZ, 1HA, 1VU, 1XE, 2CP, 2NE, 3CP, 3H9, 3HC, 3VV, 4CA, 4CO, 52O, 7L1, 8JD, 8Z2, 94Q, ACO, AMX, BCA, BCO, BSJ, BYC, CA3, CA5, CA6, CA8, CAA, CAJ, CAO, CIC, CMC, CMX, CO6, CO7, CO8, COA, COD, COF, COO, COT, COW, COZ, DCA, DCC, FAM, FCX, FRE, FYN, GRA, HAX, HMG, HSC, HXC, IVC, MCA, MCD, MDE, MLC, MYA, NHM, NHQ, NHW, NMX, OXK, Q5B, QHD, RMW, S0N, SCA, SCD, SCO, SDX, SOP, T1G,…	1120	529	A0A059WV44, A0A059WZ16, A0A059X981, A0A0D5YK08, A0A0F6AR69, A0A0H2URR1, A0A0H2WXG3, A0A0H3AQB6, A0A0H3JRU9, A0A0H3JSY9, A0A0H3JUJ1, A0A0H3K033, A0A0H3K1U2, A0A0J9X276, A0A0M3KKU5, A0A0M3KL39, A0A0R4I970, A0A0S4VB05, A0A0U2B867, A0A0W8FB26, A0A0X1KGP2, A0A0Y5D4F5, A0A1A7BFR5, A0A1C7D1B7, A0A1D0AST6, A0A1G4HIY1, A0A1J9VPY4, A0A1M9A4M7, A0A1V4VDZ9, A0A1W7GKH6, A0A2P1BT02, A0A384E132, A0A384E138, A0A…
SAM	Ancient	SAM	0UM, 0XU, 0Y0, 0Y1, 0Y2, 36A, 37H, 4IK, 62X, 6D6, 6NR, 76H, 76J, 76K, 76L, 76M, AN6, EEM, K15, P2J, SA8, SAH, SAM, SFG, SMM, SX0, TT8	1518	553	A0A024B7W1, A0A062UZ78, A0A072ZPM2, A0A077K7L1, A0A080VNW8, A0A0C3A3T0, A0A0D5YDX5, A0A0E3UPZ3, A0A0H2UR54, A0A0H3JXA8, A0A0H3JYW8, A0A0H3KB22, A0A0J5Q3C4, A0A0R4IKJ1, A0A0S2FD35, A0A0Z8EWX1, A0A125SA05, A0A166U5H3, A0A1B2TT09, A0A1B2TT18, A0A1C5AE13, A0A1I7RPU0, A0A1U7N2Z8, A0A2H1VE33, A0A2R2JFH4, A0A345IJ72, A0A384E135, A0A384KJX3, A0A3D0LE54, A0A452CSQ0, A0A452CSY9, A0A679DLY7, A0A6L7HQJ3, A0E…
Tetrahydrofolic acid	Ancient	FFO	1YJ, C2F, DHF, FFO, FOL, FON, FOZ, THF, THG, THH	123	70	A0A0N8R1B2, A0A0R0IK90, A0A140AYW5, A0A4P1LYI6, A3DHS7, A5K8L9, A7UD81, B8FUR2, B8FW00, E3NZ06, F8RC03, F8WJP6, G2IQS7, M9P0Q2, O34453, O50008, O60341, O67224, P00374, P00383, P00469, P04818, P08773, P0A017, P0A825, P0A884, P0AEZ1, P0CI79, P13255, P14207, P15328, P16184, P27248, P48728, P50431, P53603, P75430, P77398, P82610, P9WFR9, P9WHM5, P9WNX1, Q07422, Q1G930, Q1RGF0, Q3ACR9, Q46389, Q4FP21,…
Molybdopterin	Ancient	MBD	2MD, MCN, MGD, MSS, MTE, MTQ, MTV, PCD, PGD, XAX	160	60	A0A2S9RK57, D5AQH0, G3X982, G8QM55, O33818, O33819, O54050, O54051, O74029, O87948, P07658, P07850, P09152, P19913, P19915, P19919, P19921, P24183, P33937, P39185, P47989, P49050, P72178, P72223, P72224, P76342, P77165, P77489, P80457, P80563, P81186, Q06278, Q0QLF1, Q0QLF2, Q0QLF3, Q39054, Q39TV8, Q46509, Q52675, Q53176, Q57366, Q5P5I0, Q5SIP4, Q5VT66, Q6VAL8, Q71EW5, Q72EJ1, Q72LA4, Q7SIF4, Q7W…
Biopterin	Ancient	H4B	4AB, 7AP, BHS, BIO, H2B, H4B, HBI, WSD	304	23	A5K2B2, C6KTB6, O34453, O58368, P00378, P00439, P04177, P17752, P27213, P29473, P29475, P29477, P30793, P30967, P35228, P61459, P70552, Q01782, Q2Q449, Q31LX1, Q54XS1, Q64105, Q8KES3
PLP	Ancient	PLP	EM2, MPL, NOP, NPL, PDP, PLP, PLR, PMP, PXP, PZP, UAH, X04	1120	404	A0A0A5P8W7, A0A0A7GJ30, A0A0A7I435, A0A0D1XFW6, A0A0D2C5V9, A0A0F7J8S0, A0A0H2URM1, A0A0H3JPF2, A0A0J9X1Q5, A0A0J9X243, A0A0X1KHE6, A0A125YSJ9, A0A140UHE5, A0A162RZA9, A0A166JNM8, A0A1B0VPZ3, A0A1C7D191, A0A1D8PMC5, A0A1R0MXM9, A0A1S4NYF0, A0A1W2VMW5, A0A4P1LYG1, A0A4Q8MG35, A0A533IVU2, A0A5E7M111, A0A6L7HC45, A0KLG5, A0Q0N1, A0R066, A1B8Z1, A1R958, A1RDF1, A3EYF7, A4KUD2, A5K8L9, A5VD79, A6BMJ3,…
Adenosylcobalamin	Ancient	B12	B12, B1M, CNC, COB, COY	127	52	A0A0R4I997, A5F5P5, E3GWY7, E3PRJ4, E3PRJ5, E3PY95, E4N8S5, I3VE74, I3VE77, K2MB66, O08505, O24770, O33839, O50443, P06129, P0AEJ6, P10082, P11653, P13009, P19636, P20061, P20062, P22033, P27352, P31570, P37028, P80077, P80078, P97030, P9WJK5, P9WP99, Q07340, Q07341, Q1LRY0, Q2RJ67, Q3ACS0, Q3ACS2, Q3ACS3, Q3SFD8, Q46389, Q50EJ2, Q59470, Q59471, Q59476, Q746J7, Q7Z144, Q8RPG0, Q8XLZ0, Q96EY8, Q9H…
Heme	Ancient	HEA	1FH, 2FH, 522, 6HE, 76R, 7HE, BW9, CCH, COH, CV0, DDH, DHE, F0L, F0X, FDD, FDE, FEC, FMI, H02, HAS, HDD, HDE, HEA, HEB, HEC, HEM, HEO, HEV, HIF, HP5, ISW, MH0, MI9, MNH, MNR, MP1, N7H, OBV, PP9, SH0, SIR, SRM, UFE, VEA, VER, VOV, ZEM, ZNH	4454	995	A0A017T5A5, A0A023H437, A0A031LXI5, A0A037YMJ1, A0A067N4E7, A0A077KEB8, A0A087KD84, A0A087WNH2, A0A0A0BZU2, A0A0A0NSZ7, A0A0A0Y4H8, A0A0D6H8R3, A0A0E1NWS3, A0A0H3CVZ6, A0A0K2H9D8, A0A0K6ITW2, A0A0M2UZI7, A0A0M2ZSQ6, A0A0M3G7Q5, A0A0M3KKX5, A0A0M3KKX6, A0A0M3KKX7, A0A0M3KKX8, A0A0M3KL47, A0A0R4I977, A0A0R4I978, A0A0T9WNE5, A0A0U4WRC5, A0A0W8ATM9, A0A147JZ41, A0A192X9K5, A0A1B3EAY9, A0A1C7D116, A0A…
Phosphopantetheine	Ancient	PPN	PNS	59	47	A0A0X1KH98, A0A140KF01, A0A5H1ZR44, A0R0B3, A0R614, A9CHM9, D3E027, E5XP76, E9AD06, F2K074, F2K077, F4Y432, L0R8F8, O14561, O77077, P07854, P0A6A8, P0A6I6, P0ADI4, P10378, P21645, P24224, P34731, P39579, P43098, P9WPA5, Q02054, Q12053, Q39T60, Q47NR9, Q4KCZ1, Q5EDC8, Q5G940, Q5SJS9, Q5W265, Q6DNF1, Q6DNF2, Q6N882, Q70LM7, Q76KY4, Q76KY5, Q82SY3, Q89VT6, Q89VT8, Q9WZK0, W5NQT7, W5PGA3
Biotin	LUCA	BTN	BC4, BTI, BTN, BYT, DTB, Y7Y	133	43	A0A0H3JRU9, A0A2N7KUA1, A0A493R6W9, A2RMJ9, A7YYL1, A9D857, B0F481, B9A0T7, C0H419, C5AP75, C5AWU5, E7F650, O57883, O66837, P02701, P06709, P0ABD8, P11498, P12996, P13000, P22629, P24182, P29317, P43873, P56732, P56734, P9WPQ5, Q00955, Q12QS6, Q168G2, Q1H157, Q2K340, Q4Q6F6, Q59014, Q5LUF3, Q6CP22, Q89IH6, Q89U61, Q8KKW2, Q9I297, Q9I299, Q9R186, Q9X4K7
Dipyrromethane	LUCA	DPM	18W, 29P, DPM	18	5	P06983, P08397, Q43316, Q8GCA8, Q9KVM1
Lipoic acid	LUCA	LPA	LPA, LPB	10	8	P00586, P15121, P16048, P32099, Q830N7, Q838C1, Q8IEG9, Q9HKT1
Menaquinone	LUCA	MQ7	MQ7	34	10	P06009, P06010, P0A8Q0, P0A8Q3, P0AC47, P34956, Q72LA5, Q72LA6, R4P168, T2GAT5
Pyrroloquinoline Quinone	LUCA	PQQ	PQQ	33	20	A0A3F2YLY8, A3FJ48, A6T9H1, A8P0V4, C5B120, I0JWN7, P12293, P13650, P16027, P38539, Q46444, Q4AE26, Q4W6G0, Q60AR6, Q88JH0, Q8GR64, Q8ZUN8, Q93RE9, Q9Z4J7, Q9Z571
Topaquinone	LUCA	TPQ	1TY, 2TY, 3TY, 4HL, AGQ, ESB, G27, HCC, P2Q, P3Q, PAQ, T0I, TPQ, TTS, TYQ, TYY, YPZ	7	6	G4U3G8, I6WYY7, O60885, P00489, P93324, P9WFK1
Ubiquinone	LUCA	UQ1	4YP, 9BL, AT5, DBT, RQX, UHD, UQ1, UQ2, UQ5, UQ6	67	30	A0A0D6G6P6, A0A3Q2U2Y6, A5GZW8, D0VWV4, F1LC27, O44074, P00157, P00163, P06009, P06010, P07014, P08067, P0A6M2, P0AC44, P0C0Y8, P0C0Y9, P13272, P32340, P55931, P69054, P92507, Q007T0, Q02127, Q02761, Q5ZIS0, Q72LA5, Q72LA6, Q9I5F3, Q9Y6N5, Q9YHT2
CoB	Post-LUCA	COB	SHT, TP7, TPZ, TXZ, XP8, XP9	31	15	A0A1C7D1E2, A0A1C7D1E4, A0A247D6X3, A0A247D6X4, A0A2D0TC97, A0A2D0TCB4, D1JBK2, D1JBK4, H1KXL9, P07955, P07962, P11558, P58815, Q49601, Q49605
Ascorbic acid	Post-LUCA	ASC	ASC	34	21	A0A059ZFC5, A0A2K3D5Z7, A7MAQ2, P00138, P02883, P0DTD1, P24300, P29736, P39301, P78417, P94678, Q02761, Q02762, Q53TN4, Q54873, Q652L6, Q65XA0, Q8WZK8, Q9A0M7, Q9CMQ1, Q9SWS1
ThDP	Unclassified	TDP	1TP, 1U0, 2TP, 5GY, 5SR, 8EF, 8EL, 8EO, 8FL, 8ML, 8N9, 8PA, A5X, D7K, EN0, HTL, M6T, N1T, N3T, NDQ, O2T, QSP, R1T, S1T, T5X, T6F, TD5, TD6, TD7, TD8, TD9, TDK, TDL, TDM, TDN, TDP, TDW, THD, THV, THW, THY, TOG, TOI, TP8, TPP, TPU, TPW, TZD, WWF, ZP1	342	78	A0A0B8QZ66, A0A0B8R2U7, A0A0D5YC82, A0A1D8PJF9, A0A3Q0L1E1, A0A6L7H165, A0L8G4, A0L8G5, A0R2B1, A4SXU0, A8IAN1, A9H275, C5AX46, D6D942, D6PAH1, O67883, P06169, P06672, P07003, P07342, P08142, P08559, P09060, P0AEP7, P0AFG8, P0AFI0, P0CH62, P11177, P12694, P15363, P17109, P17597, P20906, P21873, P21874, P21953, P23234, P23254, P23970, P27302, P27696, P29401, P34736, P37063, P40149, P51852, P77488,…
CoM	Unclassified	COM	COM	35	28	A0A1C7D1E2, A0A1C7D1E3, A0A1C7D1E4, A0A1C7D1E5, A0A247D6X3, A0A247D6X4, A0A247D6X5, A0A2D0TCB4, D1JBK2, D1JBK3, D1JBK4, G5ELM3, H1KXL6, H1KXL9, P07955, P07962, P07964, P10599, P11558, P35754, P58815, Q13162, Q49601, Q49604, Q49605, Q56839, Q8PXZ6, Q9UM73
Factor F430	Unclassified	F43	F43, M43	23	20	A0A1C7D1E2, A0A1C7D1E3, A0A1C7D1E4, A0A1C7D1E5, A0A247D6X3, A0A247D6X4, A0A247D6X5, D1JBK2, D1JBK3, D1JBK4, H1KXL6, H1KXL9, P07955, P07962, P07964, P11558, P58815, Q49601, Q49604, Q49605
Glutathione	Unclassified	GSH	0HG, 0HH, 1JO, 1JP, 1R4, 3GC, 48T, 5AU, 6SG, ABY, AHE, ATA, BOB, BWS, BYG, EPY, ESG, GBI, GBP, GBX, GDN, GDS, GF5, GGC, GIP, GNB, GPR, GPS, GS8, GSB, GSF, GSH, GSM, GSN, GSO, GTB, GTD, GTS, GTX, GTY, GVX, HAG, HGS, IBG, ICY, JM2, JM5, JM7, L9X, LEE, LZ6, P9H, RGE, TGG, TS5, VDW, VWW, ZBF	571	266	A0A0H2Z874, A0A0M3KL33, A0A0R4I980, A0A0R4I981, A0A0R4I985, A0A1C7D1H4, A0A1M2V359, A0A1P8NWC2, A0A1W6I4R7, A0A384E145, A0A384E158, A0A3F2YM27, A1ZB72, A3CNR0, A3STM0, A4I8P2, A5E437, A5EI34, A5VWI3, A5W1A6, A6L2G9, A6TBY7, A7ILT8, A8MJH2, A8R5V3, A9CFJ9, A9PHH6, B0Y813, B1FXZ2, B1FZ96, B1M0X3, B2TEQ2, B3VQJ7, B4E6Q3, B4KM86, B6TPH0, B8F653, B8J605, B9HM14, B9HM36, B9I0G5, B9MWW0, B9VX79, C5A7Z5,…
Total				23340 (21317 unique codes)	7995 (7399 unique values)

## Sheet: Cellular _domain
Cellular_domain_uniprot	All	Percentage
Archaea	454	6.1551
Bacteria	4008	54.3384
Eukarya	2786	37.7711
Viruses	107	1.45065
metagenome	1	0.0135575
na	20	0.27115
All	7376	100

## Sheet: Cellular _domain_coenzyme_class
class	Temporality	Chronological_order	code	Bacteria	Archaea	Eukarya	Viruses	metagenome	All	Percentage
ATP_ligand	Ancient	1	ATP	942	184	1039	63	0	2228	27.9478
Flavin_adenine_dinucleotide	Ancient	2	FAD	443	28	222	5	0	698	8.75564
Flavin_Mononucleotide	Ancient	3	FMN	290	20	76	0	0	386	4.84195
Nicotinamide-adenine_dinucleotide	Ancient	4	NAD	817	84	476	8	0	1385	17.3733
Coenzyme_A	Ancient	5	COA	335	29	161	2	1	528	6.62318
S-adenosylmethionine	Ancient	6	SAM	255	56	217	25	0	553	6.93678
Thiamine_diphosphate	Ancient	7	TDP	56	4	18	0	0	78	0.978424
Tetrahydrofolic_acid	Ancient	8	FFO	49	0	19	2	0	70	0.878073
Molybdopterin	Ancient	9	MBD	46	4	9	0	0	59	0.74009
Biopterin	Ancient	10	H4B	4	1	18	0	0	23	0.28851
Pyridoxal_5'-phosphate	Ancient	11	PLP	259	23	117	2	0	401	5.03011
Adenosylcobalamin	Ancient	12	B12	41	1	10	0	0	52	0.652283
Heme	Ancient	13	HEA	614	12	365	3	0	994	12.4686
Phosphopantetheine	Ancient	16	PPN	35	1	10	0	0	46	0.57702
Biotin	LUCA	17	BTN	28	2	13	0	0	43	0.539388
Dipyrromethane	LUCA	18	DPM	3	0	2	0	0	5	0.0627195
Lipoic_acid	LUCA	19	LPA	3	1	4	0	0	8	0.100351
Menaquinone	LUCA	20	MQ7	10	0	0	0	0	10	0.125439
Pyrroloquinoline_Quinone	LUCA	21	PQQ	18	1	1	0	0	20	0.250878
Topaquinone	LUCA	22	TPQ	2	0	4	0	0	6	0.0752634
Ubiquinone	LUCA	23	UQ1	12	0	17	0	0	29	0.363773
Coenzyme_B	Post-LUCA	24	COB	0	15	0	0	0	15	0.188159
Factor_F430	Post-LUCA	25	F43	0	20	0	0	0	20	0.250878
Ascorbic_acid	Post-LUCA	26	ASC	10	0	10	1	0	21	0.263422
Coenzyme_M	Unclassified	27	COM	2	22	4	0	0	28	0.351229
Glutathione	Unclassified	28	GSH	83	0	182	1	0	266	3.33668
All				4357	508	2994	112	1	7972	100
