# Supplementary figures and images for: Coenzyme-protein interactions since early life
Source: eLife journal article supplement (doi:10.7554/elife.94174), 2024-02-26

**Supplementary File 8:** Coenzymes interacting with nucleic acids.


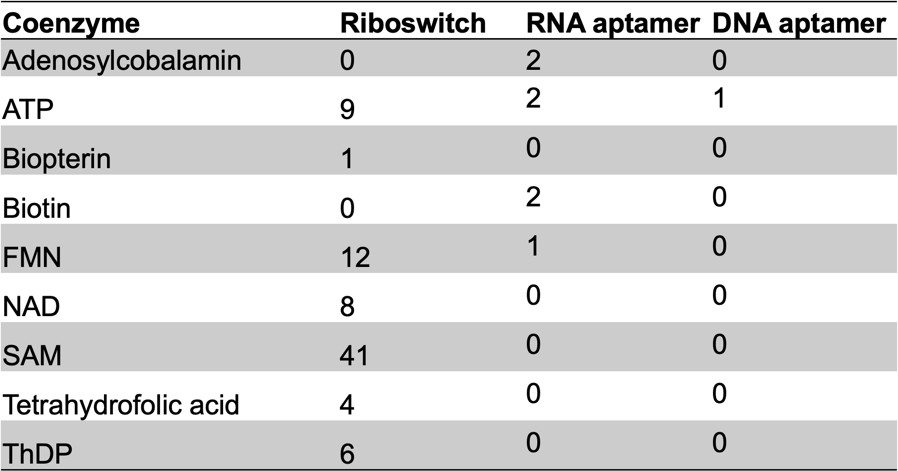

Supplement: supp8 [file supplementary file 8.docx]
